# Supplementary material for: Predictive factors associated with acute radiation dermatitis in patients with breast cancer: a retrospective cohort study
Source: PeerJ. 2025 Mar 31;13:e19202. doi: 10.7717/peerj.19202 (PMC11967412; doi:10.7717/peerj.19202)
Supplement: Supplemental Information 1 [file peerj-13-19202-s001.xlsx]

## Sheet: data
ID	Age	BMI	DM	HT	Surgicaltypes	CMTBefore	DuringHormone	Targeted	Fieldstreated	Boost	Bolus	RTType	MaxGrade	Grade_group	Age_group	BMI_group
001	56	29.18	1	1	1	1	1	0	2	0	1	1	2	1	1	2
002	60	22.4	1	1	2	1	1	0	1	1	0	1	2	1	1	1
003	62	30.84	0	0	1	1	1	0	2	0	1	1	1	0	2	3
004	67	23.1	0	0	1	1	1	0	2	0	1	1	1	0	2	1
005	50	24.5	0	0	1	1	1	0	2	0	1	1	1	0	1	1
006	68	28.02	1	1	1	1	1	0	2	0	1	1	1	0	2	2
007	49	21.27	0	0	1	1	0	1	2	0	1	1	1	0	1	1
008	61	28.39	0	0	1	1	0	1	2	0	1	1	1	0	2	2
009	75	31.78	1	1	1	1	1	0	2	0	1	1	2	1	2	3
010	36	21.04	0	0	2	1	0	0	2	1	0	1	2	1	1	1
011	64	18.67	0	0	2	0	1	0	1	1	0	2	1	0	2	1
012	55	21.41	0	0	2	1	1	0	2	0	1	1	1	0	1	1
013	58	31.45	0	0	2	0	1	0	1	1	0	2	2	1	1	3
014	34	17.96	0	0	2	0	0	0	1	1	0	1	2	1	1	1
015	75	15.59	0	1	1	1	1	0	2	0	1	1	1	0	2	1
016	48	23.73	0	0	2	1	1	0	2	1	0	1	1	0	1	1
017	57	23.65	0	0	2	0	0	0	1	1	0	2	1	0	1	1
018	22	17.87	0	0	1	1	0	1	2	0	1	1	1	0	1	1
019	52	19.8	0	0	2	0	1	0	1	1	0	2	2	1	1	1
020	41	19.85	0	0	2	0	0	0	1	1	0	2	2	1	1	1
021	59	22.66	0	0	1	1	0	0	2	0	1	1	1	0	1	1
022	61	25.39	0	0	1	1	0	1	2	0	1	1	1	0	2	2
023	71	21.36	0	1	1	1	0	0	2	0	1	1	1	0	2	1
024	49	20.53	0	0	1	1	1	0	2	0	1	1	2	1	1	1
025	72	28.64	1	1	1	1	1	0	2	0	1	1	1	0	2	2
026	48	20.4	0	0	2	1	1	0	1	1	0	2	2	1	1	1
027	57	22.21	0	0	1	1	0	0	2	0	1	1	1	0	1	1
028	49	29.04	0	0	2	1	0	0	2	1	0	1	1	0	1	2
029	58	31.38	0	0	2	1	1	0	1	1	0	1	2	1	1	3
030	46	22.18	0	0	2	0	1	0	1	1	0	1	1	0	1	1
031	71	22.67	1	1	1	1	1	0	2	0	1	1	1	0	2	1
032	49	23.02	0	0	1	1	1	0	2	0	1	1	1	0	1	1
033	32	25.61	0	0	1	1	0	0	2	0	1	1	1	0	1	2
034	77	19.9	0	0	1	1	0	1	2	0	1	1	1	0	2	1
035	46	34.34	0	0	2	0	0	0	1	1	0	1	1	0	1	3
036	39	25.09	0	0	2	0	0	0	1	1	0	1	1	0	1	2
037	54	18.79	0	0	2	0	0	0	1	1	0	1	1	0	1	1
038	56	21.61	0	0	1	1	1	0	2	0	1	1	2	1	1	1
039	60	21.6	0	1	1	1	0	0	2	0	1	1	1	0	1	1
040	71	19.29	0	1	1	1	0	0	2	0	1	1	2	1	2	1
041	42	25.78	0	0	1	1	0	1	2	0	1	1	2	1	1	2
042	68	23.78	0	0	1	1	1	0	2	0	1	1	1	0	2	1
043	47	21.19	0	0	2	1	1	0	1	1	0	2	1	0	1	1
044	45	20.25	0	0	2	1	1	0	1	1	0	2	2	1	1	1
045	66	23.9	1	1	2	0	1	0	1	1	0	2	1	0	2	1
046	63	21.87	0	0	1	1	0	0	2	0	1	1	1	0	2	1
047	71	27.14	0	1	2	0	1	0	1	0	0	2	1	0	2	2
048	52	23.45	0	0	1	1	0	0	2	0	1	1	1	0	1	1
049	47	25.76	0	0	2	0	0	0	1	1	0	1	2	1	1	2
050	56	21.66	0	0	1	1	0	0	2	0	1	1	1	0	1	1
051	48	24.5	0	0	1	1	0	0	2	0	1	1	1	0	1	1
052	49	41.91	0	0	1	1	0	0	2	0	1	1	1	0	1	3
053	47	27.81	0	0	2	1	0	1	1	1	0	2	1	0	1	2
054	34	26.6	0	0	1	1	0	0	2	0	1	1	2	1	1	2
055	48	25.68	0	1	1	1	0	1	2	0	1	1	2	1	1	2
056	72	21.89	0	0	1	1	1	0	2	0	1	1	1	0	2	1
057	44	30.53	1	1	2	1	1	0	2	1	0	1	1	0	1	3
058	75	27.27	0	0	1	1	1	0	2	0	1	1	1	0	2	2
059	59	20.08	0	0	2	1	1	0	2	1	0	1	1	0	1	1
060	74	27.96	0	1	1	1	1	0	2	0	1	1	1	0	2	2
061	61	20.08	0	0	2	1	1	0	1	1	0	1	1	0	2	1
062	60	24.31	0	0	1	1	0	0	2	0	1	1	2	1	1	1
063	44	24.06	0	0	1	1	0	1	2	0	1	1	1	0	1	1
064	44	27.11	0	0	2	0	1	0	1	1	0	2	1	0	1	2
065	51	25.27	0	1	1	1	1	0	2	0	1	1	1	0	1	2
066	76	25.59	0	0	2	0	1	0	1	1	0	2	1	0	2	2
067	48	25.8	1	1	2	0	1	0	1	1	0	2	1	0	1	2
068	64	23.62	0	0	2	0	1	0	1	1	0	1	1	0	2	1
069	67	28.14	0	1	1	1	1	0	2	0	1	1	1	0	2	2
070	55	21.12	0	0	1	1	1	0	2	0	1	1	1	0	1	1
071	55	19.51	0	0	1	1	0	0	2	1	1	1	1	0	1	1
072	69	21.74	0	1	1	1	0	0	2	0	1	1	2	1	2	1
073	71	31.78	0	1	1	1	1	0	2	0	1	1	2	1	2	3
074	55	21.25	0	0	1	1	1	0	2	0	1	1	1	0	1	1
075	64	26	0	0	1	1	0	0	2	0	1	1	1	0	2	2
076	57	24.88	1	0	1	1	1	0	2	0	1	1	2	1	1	1
077	63	20.31	0	1	2	1	0	0	2	1	0	1	2	1	2	1
078	50	23	0	0	2	0	1	0	1	1	0	2	2	1	1	1
079	62	24.37	0	0	2	0	0	0	1	1	0	2	1	0	2	1
080	49	20.39	0	0	2	0	1	0	1	1	0	2	1	0	1	1
081	43	22.27	0	0	1	1	0	1	2	0	1	1	1	0	1	1
082	57	26.08	0	1	1	1	0	0	2	0	1	1	2	1	1	2
083	52	19.69	0	0	1	1	1	0	2	0	1	1	1	0	1	1
084	38	24.07	0	0	2	1	0	0	1	1	0	1	1	0	1	1
085	32	18.66	0	0	2	0	0	0	1	1	0	2	1	0	1	1
086	59	32.25	1	0	1	1	1	0	2	0	1	1	2	1	1	3
087	58	28.64	0	0	1	1	0	0	2	0	1	1	1	0	1	2
088	39	29.55	0	0	2	1	0	0	1	1	0	1	1	0	1	2
089	48	22.82	1	1	1	1	0	0	2	0	1	1	1	0	1	1
090	46	19.44	0	0	2	1	1	0	1	1	0	2	1	0	1	1
091	37	22.37	0	0	2	0	1	0	1	1	0	1	1	0	1	1
092	56	30.27	0	1	2	0	1	0	1	1	0	2	1	0	1	3
093	75	21.03	0	1	1	1	0	0	2	0	1	1	2	1	2	1
094	62	25.59	0	0	1	1	1	0	2	0	1	1	2	1	2	2
095	58	27.6	1	1	1	1	1	0	2	0	1	1	1	0	1	2
096	45	21.1	0	0	1	1	0	0	2	0	1	1	1	0	1	1
097	72	27.69	1	0	1	1	0	0	2	0	1	1	1	0	2	2
098	69	18.61	0	0	1	1	1	0	2	0	1	1	1	0	2	1
099	65	20.63	0	0	1	1	1	0	2	0	1	1	2	1	2	1
100	37	33.8	0	0	2	1	0	0	1	1	0	1	2	1	1	3
101	51	20.49	0	0	1	1	0	0	2	0	1	1	2	1	1	1
102	55	17.82	0	0	2	0	0	0	1	1	0	2	2	1	1	1
103	66	32.53	0	0	1	1	1	0	2	0	1	1	1	0	2	3
104	49	24.94	0	0	1	0	0	0	2	0	1	1	2	1	1	1
105	54	21.15	0	0	2	1	0	0	2	1	1	1	2	1	1	1
106	39	18.73	0	0	2	1	1	0	1	1	0	2	0	0	1	1
107	50	31.13	0	0	2	0	1	0	1	1	0	2	1	0	1	3
108	62	25.59	0	0	1	1	1	0	2	0	1	1	2	1	2	2
109	60	25.2	0	0	2	1	1	0	2	1	0	1	1	0	1	2
110	73	38.32	1	1	1	1	0	0	2	0	1	1	2	1	2	3
111	44	22.64	0	0	1	1	1	0	2	0	1	1	1	0	1	1
112	57	21.06	0	1	1	1	1	0	2	0	1	1	1	0	1	1
113	49	18.59	0	0	1	1	0	0	2	0	1	1	1	0	1	1
114	70	23.01	0	1	1	1	1	0	2	0	1	1	2	1	2	1
115	56	26.14	0	0	1	1	0	0	2	0	1	1	2	1	1	2
116	51	27.53	0	0	1	1	1	0	2	0	1	1	1	0	1	2
117	54	33.2	0	1	2	0	0	0	1	1	0	1	2	1	1	3
118	54	37.51	0	1	1	1	0	1	2	0	1	1	3	1	1	3
119	61	19.49	0	0	2	1	0	0	1	1	0	2	1	0	2	1
120	69	31.73	0	0	1	1	0	1	2	0	1	1	2	1	2	3
121	41	23.31	0	0	1	0	1	0	2	0	1	1	2	1	1	1
122	46	20.74	0	0	2	0	1	0	1	1	0	1	1	0	1	1
123	46	25.64	0	0	1	1	1	0	2	0	1	1	1	0	1	2
124	62	19.48	0	0	2	1	1	0	1	1	0	1	2	1	2	1
125	64	23.03	0	1	1	1	0	0	2	0	1	1	1	0	2	1
126	42	27.18	0	0	1	1	0	0	2	0	1	1	1	0	1	2
127	61	27.26	0	0	2	1	0	0	2	1	0	1	1	0	2	2
128	66	33.08	0	1	2	0	1	0	2	1	0	1	2	1	2	3
129	55	25.93	0	0	2	1	1	0	1	1	0	2	1	0	1	2
130	44	25.28	0	0	1	1	0	0	2	0	1	1	1	0	1	2
131	53	25.06	0	1	2	0	0	0	1	1	0	1	1	0	1	2
132	63	23.11	0	1	1	1	1	0	2	0	1	1	1	0	2	1
133	54	19.93	0	1	1	1	0	0	2	0	1	1	1	0	1	1
134	52	33.01	0	1	2	1	0	0	1	1	0	1	2	1	1	3
135	31	22.96	0	0	1	1	1	0	2	0	1	1	1	0	1	1
136	55	23.07	0	1	2	0	1	0	1	1	0	2	1	0	1	1
137	48	20.94	0	0	2	1	1	0	2	1	0	1	1	0	1	1
138	76	23.59	0	0	1	0	0	0	2	0	1	1	2	1	2	1
139	61	22.64	0	0	1	1	1	0	2	0	1	1	2	1	2	1
140	29	21.38	0	0	2	0	1	0	1	1	0	2	1	0	1	1
141	72	23.56	1	1	1	1	1	0	2	0	1	1	2	1	2	1
142	51	35.55	0	1	2	1	0	0	1	1	0	1	1	0	1	3
143	64	34.69	0	1	2	1	1	0	1	1	0	1	1	0	2	3
144	82	23.6	0	1	1	1	0	0	2	0	1	1	1	0	2	1
145	54	20.03	0	0	1	1	0	0	2	0	1	1	2	1	1	1
146	67	22.14	1	1	1	1	0	0	2	0	1	1	2	1	2	1
147	60	25.98	0	0	1	1	1	0	2	0	1	1	1	0	1	2
148	62	25.43	0	1	2	0	1	0	1	0	0	1	2	1	2	2
149	47	23.7	0	0	2	1	1	0	2	1	0	1	1	0	1	1
150	47	18.22	0	0	1	1	0	0	2	0	1	1	2	1	1	1
151	65	28.79	0	1	2	0	0	0	1	0	0	1	1	0	2	2
152	60	29.26	1	0	1	1	0	1	2	0	1	1	1	0	1	2
153	76	27.82	0	1	2	0	1	0	1	1	0	2	1	0	2	2
154	62	23.69	0	0	2	1	0	0	1	1	0	2	1	0	2	1
155	68	23.32	1	1	1	1	1	0	2	0	1	1	1	0	2	1
156	40	33.23	0	0	2	1	0	0	2	1	0	1	2	1	1	3
157	55	34.49	1	1	2	0	1	0	1	1	0	1	2	1	1	3
158	58	20.08	0	0	2	1	1	0	2	1	0	1	2	1	1	1
159	56	22.94	0	0	2	1	1	0	2	1	0	1	2	1	1	1
160	67	25.76	0	0	1	1	1	0	2	0	1	1	2	1	2	2
161	52	20.09	0	0	1	1	0	0	2	0	1	1	1	0	1	1
162	40	24.18	0	0	1	1	1	0	2	0	0	1	2	1	1	1
163	39	32.41	0	0	2	1	1	0	1	1	0	1	2	1	1	3
164	47	23.07	0	1	2	0	1	0	1	1	0	2	1	0	1	1
165	56	33.69	0	0	1	1	0	0	2	0	1	1	1	0	1	3
166	64	25.15	0	0	1	1	1	0	2	0	1	1	1	0	2	2
167	55	18.88	0	0	1	1	1	0	2	0	1	1	1	0	1	1
168	59	28.91	0	0	1	1	1	0	2	0	1	1	2	1	1	2
169	46	25.12	0	0	2	1	1	0	1	1	0	1	1	0	1	2
170	44	25.12	0	0	2	1	1	0	1	1	0	2	1	0	1	2
171	46	20.82	0	0	2	1	0	0	1	1	1	1	1	0	1	1
172	64	29.1	0	0	1	1	0	0	2	0	1	1	2	1	2	2
173	56	29.73	0	1	2	1	0	0	1	1	0	2	0	0	1	2
174	68	24.11	0	1	1	1	1	0	2	0	1	1	1	0	2	1
175	65	24.73	0	0	1	1	1	0	1	1	1	1	2	1	2	1
176	48	26.95	0	0	2	1	1	0	2	1	0	1	1	0	1	2
177	41	16.29	0	0	1	1	1	0	2	0	1	1	1	0	1	1
178	65	25.11	0	0	1	1	1	0	2	0	1	1	2	1	2	2
179	42	20.02	0	0	2	0	0	0	1	1	0	2	2	1	1	1
180	49	23.33	0	0	2	1	1	0	1	1	0	2	1	0	1	1
181	58	17.9	0	0	2	0	1	0	1	1	0	2	1	0	1	1
182	49	20.38	0	1	2	0	1	0	1	1	0	2	1	0	1	1
183	48	21.87	0	0	1	1	1	0	2	1	1	1	2	1	1	1
184	77	24.91	1	1	1	0	1	0	2	0	1	1	1	0	2	1
185	54	23.31	0	0	2	0	1	0	1	1	0	2	1	0	1	1
186	51	30.12	0	0	2	0	1	0	1	1	0	1	3	1	1	3
187	43	22.03	0	0	2	1	0	0	2	1	0	1	1	0	1	1
188	49	28.44	0	1	2	0	0	0	1	1	0	1	2	1	1	2
189	61	24.24	0	0	1	1	0	0	2	0	1	1	2	1	2	1
190	71	28.74	0	0	1	0	1	0	1	1	1	1	3	1	2	2
191	49	21.76	0	0	1	1	1	0	2	0	1	1	1	0	1	1
192	49	19.6	0	0	1	1	1	0	2	0	1	1	1	0	1	1
193	51	27.56	0	0	1	1	0	0	2	0	1	1	2	1	1	2
194	65	23.18	0	1	1	1	1	0	2	0	1	1	1	0	2	1
195	58	20.64	0	0	1	0	1	0	2	0	1	1	1	0	1	1
196	54	23.71	0	0	1	1	0	0	2	0	1	1	1	0	1	1
197	43	17.57	0	0	2	0	0	0	1	1	0	2	2	1	1	1
198	61	20.91	0	0	2	1	0	0	1	1	0	2	1	0	2	1
199	53	23.83	0	0	1	1	0	1	2	0	1	1	2	1	1	1
200	41	24.89	0	1	2	0	1	0	1	1	0	2	1	0	1	1
201	55	19.95	0	0	2	1	1	0	1	1	0	2	1	0	1	1
202	56	24.69	0	0	2	0	1	0	1	1	0	2	1	0	1	1
203	64	20.02	0	0	2	0	1	0	1	1	0	1	1	0	2	1
204	51	24.89	0	0	2	1	0	1	1	1	0	2	1	0	1	1
205	47	27.25	0	0	1	0	0	0	2	0	1	1	1	0	1	2
206	69	34.44	1	1	2	1	0	0	2	0	0	1	1	0	2	3
207	45	25.4	0	0	1	1	0	0	2	0	1	1	3	1	1	2
208	48	19.98	0	0	2	0	0	0	1	1	0	2	1	0	1	1
209	59	24	0	0	1	1	0	0	2	0	0	1	2	1	1	1
210	70	26.4	0	0	1	1	1	0	2	0	1	1	1	0	2	2
211	50	25.04	0	1	1	1	0	0	2	0	1	1	1	0	1	2
212	65	28.73	1	1	2	0	1	0	2	0	0	1	1	0	2	2
213	54	20.21	0	0	2	1	0	0	2	1	0	1	2	1	1	1
214	40	22.27	0	0	2	1	0	1	1	1	0	1	1	0	1	1
215	59	29.88	0	0	1	1	1	0	2	1	1	1	3	1	1	2
216	63	24.95	0	1	1	1	0	0	2	0	1	1	1	0	2	1
217	39	19.53	0	0	1	1	1	0	2	0	1	1	1	0	1	1
218	57	33.42	0	0	2	1	1	0	1	1	0	1	2	1	1	3
219	45	27.32	0	0	1	1	0	1	2	0	1	1	2	1	1	2
220	41	20.07	0	0	1	1	1	0	2	0	1	1	1	0	1	1
221	48	19.11	0	0	2	0	1	0	1	1	0	2	1	0	1	1
222	31	20.7	0	0	2	1	0	0	1	1	0	1	2	1	1	1
223	56	30.82	0	0	1	1	1	0	2	0	1	1	2	1	1	3
224	39	24.38	0	0	1	0	0	0	1	0	1	1	2	1	1	1
225	51	28.32	0	0	1	1	0	0	2	0	1	1	3	1	1	2
226	54	22.27	1	0	1	1	1	0	2	0	1	1	1	0	1	1
227	36	20.2	0	0	2	0	1	0	1	1	0	1	1	0	1	1
228	40	21.14	1	0	1	1	0	0	2	0	1	1	2	1	1	1
229	64	23.18	0	1	1	0	1	0	2	0	1	1	1	0	2	1
230	61	25.32	1	1	1	1	1	0	2	0	1	1	2	1	2	2
231	58	24.12	0	0	1	1	0	0	2	0	1	1	1	0	1	1
232	63	23.29	0	0	1	1	0	1	2	0	1	1	1	0	2	1
233	57	27.88	0	1	2	0	1	0	1	1	0	2	1	0	1	2
234	55	29.78	0	0	1	1	1	0	2	0	1	1	2	1	1	2
235	66	21.64	0	1	1	1	0	0	2	0	1	1	1	0	2	1
236	42	20.51	0	0	1	1	0	0	2	0	1	1	1	0	1	1
237	44	19.47	0	0	1	1	0	1	2	0	1	1	1	0	1	1
238	66	27.07	1	0	2	0	0	0	1	1	0	1	1	0	2	2
239	45	20.45	0	0	2	0	0	0	1	1	0	1	1	0	1	1
240	63	26.29	0	0	1	1	0	0	2	0	1	1	2	1	2	2
241	48	19.68	0	0	2	1	1	0	2	1	0	1	1	0	1	1
242	61	33.77	0	0	2	1	1	0	1	1	0	1	1	0	2	3
243	44	17.3	0	1	1	1	0	0	2	0	1	1	1	0	1	1
244	60	27.2	0	0	1	1	1	0	2	0	1	1	1	0	1	2
245	44	25.35	0	0	1	1	0	1	2	0	1	1	1	0	1	2
246	53	21.87	0	0	2	1	0	0	1	1	1	1	3	1	1	1
247	50	29.58	0	0	1	1	1	0	2	0	1	1	1	0	1	2
248	40	19.63	0	0	1	1	1	0	2	0	1	1	1	0	1	1
249	45	23.62	0	0	1	1	1	0	2	0	1	1	1	0	1	1
250	61	24.09	0	1	2	0	0	0	1	1	0	2	0	0	2	1
251	51	21.56	0	0	2	1	0	0	1	1	0	2	1	0	1	1
252	54	27.64	0	1	2	0	1	0	1	1	0	2	1	0	1	2
253	54	26.84	0	0	1	1	0	1	2	0	1	1	2	1	1	2
254	48	24.69	0	0	2	0	1	0	1	1	0	1	1	0	1	1
255	71	23.75	0	0	1	1	0	1	2	0	0	1	2	1	2	1
256	58	20.76	0	0	1	1	1	0	2	0	1	1	1	0	1	1
257	63	24.75	0	0	1	1	0	0	2	0	1	1	2	1	2	1
258	67	20.84	0	0	2	0	1	0	2	0	0	1	1	0	2	1
259	59	27.06	0	0	2	1	1	0	2	0	0	2	1	0	1	2
260	36	18.36	0	0	2	0	1	0	1	1	0	1	1	0	1	1
261	53	29.24	0	0	1	1	0	1	2	0	1	1	1	0	1	2
262	28	23.74	0	0	1	1	0	0	2	0	1	1	1	0	1	1
263	55	32.09	0	1	1	1	0	0	2	0	1	1	2	1	1	3
264	52	26.62	0	0	1	1	1	0	2	0	1	1	1	0	1	2
265	27	19.31	0	0	2	0	1	0	1	1	0	1	2	1	1	1
266	32	23.02	0	0	2	1	0	0	2	0	1	1	2	1	1	1
267	71	35.51	1	1	1	1	1	0	2	0	1	1	1	0	2	3
268	41	20.22	0	0	2	0	1	0	1	1	0	2	2	1	1	1
269	58	17.35	0	0	1	0	0	0	2	0	1	1	1	0	1	1
270	40	21.68	0	0	2	0	1	0	1	1	0	2	1	0	1	1
271	51	30.47	0	1	1	1	0	0	2	0	1	1	2	1	1	3
272	43	19.51	0	0	2	0	1	0	1	1	0	2	1	0	1	1
273	39	18.58	0	0	1	1	1	0	2	1	1	1	2	1	1	1
274	41	20.27	0	0	1	1	0	0	2	0	1	1	1	0	1	1
275	48	18.31	0	0	1	1	0	0	2	0	1	1	2	1	1	1
276	60	24.22	0	0	1	1	1	0	2	0	1	1	1	0	1	1
277	50	17.04	1	0	1	1	0	0	2	0	1	1	2	1	1	1
278	65	20.89	0	0	1	1	1	0	2	0	1	1	1	0	2	1
279	48	21.1	0	0	2	1	0	0	1	1	0	2	1	0	1	1
280	41	34.43	0	0	1	1	0	1	2	0	1	1	2	1	1	3
281	55	25.19	0	0	1	1	1	0	2	0	1	1	1	0	1	2
282	56	23.93	0	0	1	1	0	0	2	0	1	1	2	1	1	1
283	75	20.12	1	1	1	1	0	0	2	0	1	1	1	0	2	1
284	59	22.55	0	0	2	1	0	0	1	1	0	1	1	0	1	1
285	40	26.32	0	0	2	1	1	0	1	1	0	1	1	0	1	2
286	76	20.59	0	0	1	1	1	0	2	0	1	1	1	0	2	1
287	43	18.59	0	0	2	1	1	0	1	1	0	2	1	0	1	1
288	78	27.35	0	1	1	0	1	0	2	0	1	1	1	0	2	2
289	48	19.44	0	0	2	0	0	0	1	1	0	2	1	0	1	1
290	60	21.5	0	0	1	1	1	0	2	1	1	1	3	1	1	1
291	48	20.93	0	0	1	1	1	0	2	0	1	1	1	0	1	1
292	41	19.23	0	0	2	0	1	0	1	1	0	2	1	0	1	1
293	52	28.24	0	0	1	1	0	0	2	0	1	1	2	1	1	2
294	60	28.3	0	0	1	1	1	0	2	0	1	1	1	0	1	2
295	59	22.55	0	0	2	1	0	0	1	1	0	1	1	0	1	1
296	71	24.6	1	0	1	1	1	0	2	0	1	1	2	1	2	1
297	42	26.23	0	0	1	1	0	0	2	1	1	1	3	1	1	2
298	46	22.63	0	0	1	0	1	0	1	1	1	1	1	0	1	1
299	47	19.72	0	0	2	1	1	0	1	1	0	2	1	0	1	1
300	64	25.46	0	0	1	1	0	0	2	0	1	1	1	0	2	2
301	57	22.25	0	0	2	1	0	0	1	1	0	1	1	0	1	1
302	45	19.55	0	0	1	1	1	0	2	0	1	1	1	0	1	1
303	64	28.92	0	1	1	1	1	0	2	0	1	1	1	0	2	2
304	60	26.52	0	1	2	0	1	0	1	0	0	1	1	0	1	2
305	60	23.83	0	0	1	1	1	0	2	0	1	1	1	0	1	1
306	55	17.63	0	1	2	0	1	0	1	1	0	1	2	1	1	1
307	53	22.72	0	0	2	0	1	0	1	1	0	2	2	1	1	1
308	57	24.94	0	0	2	1	0	0	1	1	0	1	2	1	1	1
309	37	28.32	0	0	1	1	1	0	2	0	1	1	2	1	1	2
310	61	23.59	0	1	2	1	0	0	1	1	0	2	1	0	2	1
311	38	19.78	0	0	2	1	0	0	1	1	0	1	2	1	1	1
312	54	23.73	0	0	2	1	1	0	1	0	0	2	1	0	1	1
313	46	24.01	0	0	1	1	0	1	2	0	1	1	1	0	1	1
314	42	18.59	0	0	2	0	1	0	1	1	0	1	1	0	1	1
315	55	21.37	0	1	1	1	0	0	2	1	1	1	2	1	1	1
316	60	23.56	0	1	1	1	1	0	2	0	1	1	1	0	1	1
317	40	25.15	0	0	2	1	0	0	2	1	0	1	1	0	1	2
318	55	32.43	0	1	2	1	0	0	2	0	0	1	1	0	1	3
319	58	22.6	0	0	1	1	1	0	2	0	1	1	1	0	1	1
320	49	25.59	0	0	2	0	1	0	1	1	0	1	1	0	1	2
321	47	31.41	0	0	2	0	1	0	1	1	0	2	1	0	1	3
322	40	31.83	0	0	2	1	1	0	1	1	0	1	2	1	1	3
323	67	26.1	1	1	1	1	1	0	2	0	1	1	1	0	2	2
324	57	24.35	0	1	2	1	1	0	1	1	0	2	2	1	1	1
325	56	22.44	0	0	1	1	1	0	2	0	1	1	1	0	1	1
326	64	27.27	0	0	2	0	0	0	1	0	0	2	1	0	2	2
327	43	30.11	0	0	2	1	1	1	1	1	0	1	1	0	1	3
328	49	26.1	0	0	2	0	1	0	1	1	0	2	1	0	1	2
329	25	21.97	0	0	2	0	1	0	1	1	0	1	2	1	1	1
330	52	22.66	0	0	1	1	1	1	2	1	1	1	1	0	1	1
331	60	23.24	0	1	2	1	0	0	1	1	0	1	1	0	1	1
332	56	30.2	0	1	1	1	0	0	2	0	1	1	2	1	1	3
333	58	34.38	0	1	1	1	1	0	2	0	1	1	2	1	1	3
334	41	18.83	0	0	2	1	1	0	1	1	0	2	1	0	1	1
335	40	26.67	0	0	2	0	1	0	1	0	0	1	1	0	1	2
336	49	28.24	0	1	2	0	1	0	1	0	0	2	1	0	1	2
337	73	19.82	0	0	1	1	1	0	2	0	1	1	1	0	2	1
338	53	26.4	0	0	2	0	0	0	1	1	0	2	1	0	1	2
339	34	20.04	0	0	2	1	1	0	2	1	0	1	2	1	1	1
340	48	29	0	0	1	1	0	0	2	0	1	1	3	1	1	2
341	67	20.27	0	0	1	1	1	0	2	0	1	1	1	0	2	1
342	49	25.21	0	0	2	1	1	0	2	1	0	1	1	0	1	2
343	70	25.96	0	0	2	0	1	0	1	0	0	1	1	0	2	2
344	42	28.13	0	0	1	1	0	0	2	0	1	1	3	1	1	2
345	54	29.77	0	0	1	1	0	0	2	0	1	1	1	0	1	2
346	63	39.34	0	1	2	1	1	0	2	0	0	1	3	1	2	3
347	51	25.72	0	0	2	1	1	0	1	1	0	2	1	0	1	2
348	65	22.84	0	0	1	1	1	0	2	0	1	1	1	0	2	1
349	50	20.03	0	0	2	1	0	0	2	1	0	1	1	0	1	1
350	70	22.3	0	0	2	0	1	0	1	1	0	2	1	0	2	1
351	49	40.66	0	0	2	1	0	0	2	0	0	1	2	1	1	3
352	62	24.03	1	0	1	0	0	0	1	0	0	2	1	0	2	1
353	70	23.21	0	0	1	1	1	0	2	0	1	1	1	0	2	1
354	45	18.33	0	1	2	0	0	0	1	1	0	2	1	0	1	1
355	58	32.07	0	1	2	1	0	0	1	0	0	1	1	0	1	3
356	45	27.14	0	0	1	0	1	0	2	0	1	1	2	1	1	2
357	78	22.09	0	1	1	1	1	0	2	0	1	1	1	0	2	1
358	47	23.23	0	0	1	1	1	0	2	0	1	1	1	0	1	1
359	49	25.9	0	0	2	1	0	0	1	1	0	2	1	0	1	2
360	59	29.69	0	1	1	0	0	0	2	0	1	1	2	1	1	2
361	44	32.27	0	1	1	1	1	0	2	1	1	1	1	0	1	3
362	52	22.19	0	0	2	1	1	1	1	1	0	1	1	0	1	1
363	54	24.03	0	1	1	1	1	0	2	0	1	1	1	0	1	1
364	58	36.72	0	1	1	1	0	0	2	0	1	1	1	0	1	3
365	72	22.76	1	1	1	1	0	1	2	0	1	1	1	0	2	1
366	61	24.22	0	0	1	1	1	0	2	0	1	1	2	1	2	1
367	69	23.26	1	0	1	1	0	0	2	0	1	1	2	1	2	1
368	59	25.16	1	0	2	1	0	0	1	1	0	2	1	0	1	2
369	45	35.13	0	0	1	1	0	0	2	0	1	1	2	1	1	3
370	34	27.85	0	0	2	1	1	0	1	1	0	1	2	1	1	2
371	46	21.21	0	0	2	0	1	0	1	1	0	1	1	0	1	1
372	50	28.13	0	1	2	1	0	0	1	1	0	1	1	0	1	2
373	49	19.07	0	0	2	0	1	0	1	1	0	1	1	0	1	1
374	45	19.05	0	0	2	0	1	0	1	1	0	1	1	0	1	1
375	47	22.83	0	1	2	1	1	0	1	1	0	1	2	1	1	1
376	53	22.77	0	0	2	0	1	0	1	0	0	2	1	0	1	1
377	46	21.83	0	0	2	0	0	0	1	1	0	2	2	1	1	1
378	57	23.15	1	0	1	1	1	0	2	0	1	1	1	0	1	1
379	42	28.47	1	1	2	1	1	0	1	1	0	2	2	1	1	2
380	72	25.63	0	1	2	0	1	0	1	0	0	1	1	0	2	2
381	56	24.8	0	0	2	0	1	0	1	1	0	2	1	0	1	1
382	66	21.64	0	0	1	1	1	0	2	0	1	1	1	0	2	1
383	64	22.77	0	0	1	1	1	0	2	0	1	1	1	0	2	1
384	57	26.8	0	0	1	1	0	0	2	0	1	1	1	0	1	2
385	46	27.64	0	0	1	1	1	1	2	0	1	1	2	1	1	2
386	72	26.06	0	1	2	1	0	0	1	0	0	1	2	1	2	2
387	42	28.91	0	0	1	1	1	0	2	0	1	1	1	0	1	2
388	71	23.05	1	1	1	1	0	0	2	0	1	1	1	0	2	1
389	37	28.57	0	0	2	1	0	0	1	1	0	1	2	1	1	2
390	63	28.22	0	0	1	1	1	1	2	0	1	1	1	0	2	2
391	49	23.9	0	0	2	0	1	0	1	1	0	1	1	0	1	1
392	64	27.73	1	1	1	1	0	1	2	0	1	1	2	1	2	2
393	63	24.44	0	0	1	1	0	1	2	0	1	1	2	1	2	1
394	42	30.02	0	0	2	1	0	0	2	1	0	1	1	0	1	3
395	77	23.73	0	1	1	0	1	0	2	0	1	1	1	0	2	1
396	61	20	1	0	1	1	1	1	1	0	1	1	2	1	2	1
397	57	24.49	0	0	2	0	0	0	1	0	0	2	1	0	1	1
398	76	23.61	1	1	1	1	0	1	1	0	1	1	1	0	2	1
399	47	18.67	0	0	2	1	0	0	1	0	0	2	1	0	1	1
400	63	16.4	0	0	1	1	1	1	2	0	1	1	1	0	2	1
401	52	19.52	0	0	1	1	0	1	2	0	1	1	1	0	1	1
402	67	21.94	0	1	2	0	1	0	1	0	0	2	1	0	2	1
403	52	21.43	0	0	1	1	1	0	2	0	1	1	2	1	1	1
404	47	24.35	0	0	1	1	0	0	2	0	1	1	1	0	1	1
405	52	27.34	0	0	2	1	0	1	1	1	0	2	1	0	1	2
406	70	23.63	0	1	1	1	0	0	2	0	1	1	1	0	2	1
407	45	38.48	1	1	2	0	1	0	1	1	0	1	2	1	1	3
408	66	28.69	0	0	2	1	1	0	1	0	0	2	1	0	2	2
409	56	31.23	0	0	1	1	0	1	2	0	1	1	1	0	1	3
410	51	18.94	0	0	1	0	0	0	2	0	1	1	1	0	1	1
411	49	22.99	0	0	1	1	1	0	2	0	1	1	1	0	1	1
412	51	19.3	0	0	2	0	0	0	1	1	0	2	1	0	1	1
413	68	22.18	0	1	1	1	1	0	2	0	1	1	1	0	2	1
414	60	27.94	0	1	2	1	1	0	2	1	0	1	1	0	1	2
415	61	21.75	0	0	2	0	1	0	1	1	0	2	1	0	2	1
416	55	17.39	0	0	2	0	1	0	1	1	0	2	1	0	1	1
417	40	42.46	0	0	2	1	0	0	1	1	0	2	1	0	1	3
418	67	25.29	0	1	1	1	0	1	2	0	1	1	1	0	2	2
419	54	26.57	0	0	1	1	0	0	2	0	1	1	2	1	1	2
420	58	24.33	0	0	1	1	0	0	2	0	1	1	1	0	1	1
421	73	23.01	0	0	1	1	1	0	2	0	1	1	1	0	2	1
422	63	24.28	0	0	1	1	1	0	2	0	1	1	1	0	2	1
423	65	24.32	0	0	1	1	0	0	2	0	1	1	2	1	2	1
424	59	23.95	0	0	2	0	1	0	1	1	0	2	1	0	1	1
425	45	26.37	0	0	1	1	0	0	2	0	1	1	2	1	1	2
426	67	29.33	0	1	1	1	1	0	2	0	1	1	1	0	2	2
427	55	25.89	1	0	1	1	0	0	2	0	1	1	1	0	1	2
428	46	23.71	0	0	1	1	0	0	1	1	0	1	1	0	1	1
429	41	22.23	0	0	1	1	1	0	2	0	1	1	2	1	1	1
430	63	21.69	0	0	2	1	0	1	1	1	0	1	1	0	2	1
431	45	33.94	0	1	2	0	0	0	1	1	0	1	1	0	1	3
432	59	24.75	0	0	2	1	1	1	1	1	0	1	1	0	1	1
433	54	30.07	0	0	2	0	0	0	1	1	0	2	2	1	1	3
434	64	21.23	0	0	1	1	1	1	2	0	1	1	2	1	2	1
435	59	24.34	1	0	2	1	1	1	1	1	0	2	1	0	1	1
436	43	20.46	0	0	1	0	0	0	1	1	1	1	2	1	1	1
437	52	21.88	0	0	2	0	1	0	1	0	0	2	1	0	1	1
438	51	21.63	0	0	1	1	0	0	2	0	1	1	2	1	1	1
439	56	25.32	0	1	1	1	1	0	2	0	1	1	1	0	1	2
440	59	22.95	0	0	1	1	0	0	2	0	1	1	1	0	1	1
441	73	21.22	0	1	1	1	1	0	2	0	1	1	1	0	2	1
442	64	25.78	1	1	1	1	0	1	2	0	1	1	2	1	2	2
443	63	28.29	0	0	2	1	1	0	1	1	0	1	1	0	2	2
444	56	27.81	0	0	1	1	1	0	2	0	1	1	1	0	1	2
445	67	24.89	1	0	1	1	0	1	2	0	1	1	1	0	2	1
446	62	27.47	0	0	1	1	1	0	2	0	1	1	2	1	2	2
447	56	25.76	0	1	1	1	0	0	2	0	1	1	2	1	1	2
448	55	22.89	0	0	1	1	0	0	2	0	1	1	1	0	1	1
449	40	21.45	0	0	1	1	0	0	2	0	1	1	2	1	1	1
450	64	18.93	0	1	1	1	0	1	2	0	1	1	2	1	2	1
451	53	25.85	0	0	1	1	0	0	2	0	1	1	2	1	1	2
452	58	19.91	0	0	1	1	0	1	2	0	1	1	1	0	1	1
453	68	25.78	0	0	1	1	0	0	2	0	1	1	2	1	2	2
454	55	29.9	0	0	2	1	0	0	1	1	0	2	1	0	1	2
455	73	30.4	1	1	2	0	1	0	1	0	0	1	1	0	2	3
456	66	24.36	0	0	2	1	0	1	1	1	0	1	1	0	2	1
457	47	28.32	0	0	2	1	0	0	2	1	0	1	1	0	1	2
458	72	19.86	0	0	1	1	0	1	2	0	1	1	1	0	2	1
459	48	20.85	0	0	2	0	1	0	1	1	0	2	1	0	1	1
460	36	26.17	0	0	1	1	0	0	2	0	1	1	2	1	1	2
461	66	18.98	0	0	1	1	0	0	2	0	0	1	1	0	2	1
462	41	29.68	0	0	2	1	0	0	1	1	0	2	1	0	1	2
463	48	20.73	0	0	1	1	1	0	2	0	0	1	1	0	1	1
464	68	26.61	0	0	2	1	0	0	1	1	0	2	1	0	2	2
465	56	30.43	0	0	1	1	1	0	2	0	1	1	2	1	1	3
466	56	22.89	0	0	1	1	0	0	2	0	1	1	1	0	1	1
467	61	21.38	0	0	2	1	1	0	2	0	0	1	1	0	2	1
468	46	24.67	0	0	1	1	1	1	2	0	0	1	2	1	1	1
469	51	21.13	0	0	2	0	1	0	1	1	0	2	1	0	1	1
470	58	23.91	1	1	1	1	1	1	2	0	1	1	1	0	1	1
471	58	20.81	0	0	1	1	0	0	2	0	1	1	2	1	1	1
472	48	20.5	0	0	2	0	1	0	1	1	0	2	1	0	1	1
473	42	25.97	0	0	2	1	1	0	1	1	0	2	1	0	1	2
474	56	22.83	0	0	1	1	0	1	2	0	1	1	1	0	1	1
475	64	22.3	0	0	2	1	1	0	1	0	0	2	1	0	2	1
476	49	25.44	0	1	1	1	0	0	2	0	1	1	2	1	1	2
477	37	23.51	0	0	2	0	1	0	1	1	0	2	1	0	1	1
478	63	22.64	0	0	1	1	1	0	2	0	1	1	1	0	2	1
479	57	28.68	1	0	2	1	0	0	1	1	0	2	1	0	1	2
480	56	23.79	0	0	2	0	1	0	1	1	0	2	1	0	1	1
481	68	27.02	0	1	2	0	1	0	1	0	0	2	1	0	2	2
482	62	20.5	0	1	2	1	0	1	2	1	0	1	1	0	2	1
483	73	20.08	0	0	2	0	1	0	1	0	0	2	1	0	2	1
484	70	26.48	0	0	1	1	1	1	2	0	1	1	1	0	2	2
485	74	21.43	0	0	1	1	1	1	2	0	1	1	1	0	2	1
486	75	33.06	0	0	2	1	1	0	1	0	0	1	2	1	2	3
487	48	20.08	0	0	1	1	1	0	2	0	1	1	2	1	1	1
488	75	20.13	1	1	1	1	1	0	2	0	1	1	2	1	2	1
489	32	27.47	0	0	2	1	0	0	2	1	0	1	1	0	1	2
490	41	18.9	0	0	2	1	0	1	2	1	0	1	1	0	1	1
491	51	22.19	0	0	1	1	0	0	2	0	1	1	1	0	1	1
492	36	26.81	0	0	2	1	0	0	1	1	0	2	1	0	1	2
493	55	26.44	1	1	2	0	1	0	1	1	0	2	1	0	1	2
494	56	26.5	0	0	1	1	0	1	2	0	1	1	1	0	1	2
495	58	27.33	0	1	1	1	1	0	2	0	1	1	3	1	1	2
496	66	31.43	1	1	1	1	1	0	2	0	1	1	1	0	2	3
497	42	27.18	0	0	1	1	0	0	2	0	1	1	2	1	1	2
498	45	30.53	0	0	2	1	0	0	1	1	0	2	1	0	1	3
499	52	23.73	0	0	1	1	0	0	2	0	1	1	2	1	1	1
500	52	24.16	0	0	1	1	1	0	2	0	1	1	1	0	1	1
501	32	21.63	0	0	1	1	0	0	2	0	1	1	1	0	1	1
502	55	26.8	0	0	2	0	1	0	1	1	0	2	1	0	1	2
503	63	19.29	1	1	1	1	0	1	2	0	1	1	1	0	2	1
504	69	30.12	0	1	1	1	0	1	2	0	1	1	1	0	2	3
505	57	33.6	1	0	1	1	1	0	2	0	1	1	2	1	1	3
506	55	26.91	0	0	1	1	1	0	2	0	1	1	1	0	1	2
507	30	27.89	0	0	1	1	0	0	2	0	1	1	1	0	1	2
508	49	17.5	0	0	1	1	1	0	2	0	1	1	1	0	1	1
509	45	22.27	0	0	1	1	0	0	2	0	1	1	1	0	1	1
510	38	41.45	0	0	2	1	1	0	1	1	0	1	2	1	1	3
511	47	34.63	0	0	1	1	0	1	2	0	1	1	1	0	1	3
512	57	19.36	0	0	2	0	0	0	1	1	0	2	1	0	1	1
513	45	27.07	1	0	2	1	1	0	1	1	0	1	1	0	1	2
514	75	23.07	0	1	1	1	1	0	2	0	1	1	1	0	2	1
515	63	26.39	1	1	2	1	0	0	1	1	0	1	2	1	2	2
516	67	23.31	0	0	1	1	0	1	2	0	1	1	1	0	2	1
517	29	21.08	0	0	1	1	0	0	2	0	1	1	1	0	1	1
518	45	24.46	0	0	1	0	0	0	2	0	1	1	1	0	1	1
519	59	28.44	1	1	2	1	0	1	2	1	0	1	2	1	1	2
520	41	27.81	1	0	1	1	1	0	2	0	1	1	1	0	1	2
521	58	29.69	1	0	2	0	1	0	1	1	0	2	0	0	1	2
522	26	19.23	0	0	1	0	0	0	1	1	1	1	2	1	1	1
523	73	28.65	0	1	1	0	0	0	2	0	1	1	1	0	2	2
524	63	19.99	0	1	1	1	0	0	2	0	1	1	1	0	2	1
525	40	25.44	0	0	1	1	1	1	2	0	1	1	1	0	1	2
526	43	24.03	0	0	2	0	1	0	1	1	0	2	1	0	1	1
527	55	19.96	0	0	1	1	0	1	2	0	1	1	1	0	1	1
528	75	25.88	0	0	2	0	0	0	1	0	0	2	1	0	2	2
529	40	18.5	0	0	2	1	1	0	1	1	0	2	1	0	1	1
530	65	20.78	0	0	1	1	0	0	2	0	1	1	1	0	2	1
531	73	24.32	0	0	1	1	1	0	2	0	1	1	2	1	2	1
533	59	22.51	0	0	2	1	0	0	1	1	0	2	2	1	1	1
534	39	19.35	0	0	2	1	1	0	1	1	0	1	1	0	1	1
535	30	25.77	0	0	1	1	0	0	2	0	1	1	1	0	1	2
536	64	22	0	0	1	1	0	1	2	0	1	1	2	1	2	1
537	56	23.34	0	0	2	0	0	0	1	1	0	2	2	1	1	1
538	46	21.42	0	0	2	0	1	0	1	1	0	2	1	0	1	1
539	68	25.24	0	0	1	1	1	0	2	0	0	1	1	0	2	2
540	48	45.24	0	0	2	1	0	0	1	1	0	2	1	0	1	3
541	27	30.86	0	0	2	0	1	0	1	1	0	2	1	0	1	3
542	53	19.71	0	0	1	1	1	0	2	0	1	1	0	0	1	1
543	67	22.88	1	0	1	1	0	0	2	0	1	1	1	0	2	1
544	48	24.52	0	0	2	0	0	0	1	1	0	2	1	0	1	1
545	45	23.77	0	0	1	1	0	0	2	0	1	1	1	0	1	1
546	64	21.74	0	0	1	1	1	1	2	0	1	1	1	0	2	1
547	54	28.52	0	0	1	1	1	0	2	0	1	1	1	0	1	2
548	49	25.51	0	0	2	1	1	0	2	0	0	1	2	1	1	2
549	51	23.79	0	0	2	0	1	0	1	1	0	2	1	0	1	1
550	57	22.07	0	0	1	1	1	0	2	0	1	1	1	0	1	1
551	50	19.74	1	0	2	0	0	0	1	1	0	2	1	0	1	1
552	44	27.77	0	1	2	1	0	0	1	1	0	2	3	1	1	2
553	51	31.55	0	0	2	1	0	1	1	1	0	1	2	1	1	3
554	74	23.94	0	1	1	1	1	1	2	0	1	1	2	1	2	1
555	59	21	0	0	1	1	0	1	2	0	1	1	2	1	1	1
556	63	28.91	1	1	2	1	1	0	1	1	0	2	1	0	2	2
557	72	21.37	0	1	1	1	0	0	2	0	1	1	1	0	2	1
558	60	20.06	0	1	2	0	1	0	1	0	0	2	2	1	1	1
559	53	28.6	0	0	2	0	1	0	2	1	0	1	2	1	1	2
560	50	20.75	1	1	1	1	1	0	2	0	1	1	2	1	1	1
561	61	20.85	0	0	2	1	1	0	1	0	0	2	1	0	2	1
562	53	27.94	0	1	1	1	0	1	2	0	1	1	1	0	1	2
563	53	20.56	0	0	1	0	0	0	2	1	1	1	1	0	1	1
564	61	20.69	0	0	1	1	1	0	2	0	1	1	1	0	2	1
565	45	23.55	0	0	1	1	0	1	2	0	1	1	1	0	1	1
566	44	34.21	1	1	1	1	1	0	2	0	1	1	1	0	1	3
567	50	19.74	1	0	2	0	0	0	1	0	0	2	1	0	1	1
568	52	21.56	0	0	2	1	1	0	1	1	0	2	1	0	1	1
569	40	26.04	0	0	2	1	0	0	1	1	0	1	2	1	1	2
570	39	22.04	0	0	1	1	1	0	2	0	1	1	1	0	1	1
571	45	28.02	0	0	2	1	1	0	1	1	0	1	2	1	1	2
572	47	19.4	0	0	1	1	1	0	2	0	1	1	1	0	1	1
573	52	22.66	0	0	2	0	0	0	1	1	0	2	1	0	1	1
574	24	16.85	0	0	1	1	0	1	2	0	1	1	2	1	1	1
575	43	25.81	0	0	1	1	1	0	2	0	1	1	1	0	1	2
576	70	20.59	0	0	1	1	0	1	2	0	1	1	1	0	2	1
577	64	23.02	1	1	1	1	0	1	2	0	1	1	1	0	2	1
578	45	26.97	0	1	1	1	0	0	2	1	1	1	3	1	1	2
579	53	32.77	0	0	1	1	0	0	2	0	1	1	1	0	1	3
580	39	22.63	0	0	1	1	1	0	2	0	1	1	1	0	1	1
581	50	23.58	0	0	1	1	0	0	2	0	1	1	1	0	1	1
582	55	25.39	0	0	1	1	1	1	2	0	1	1	2	1	1	2
583	46	25.06	0	0	1	1	0	0	2	0	1	1	2	1	1	2
584	53	21.79	0	0	1	0	0	0	2	0	1	1	3	1	1	1
585	55	35.2	0	0	1	1	0	0	2	0	1	1	1	0	1	3
586	37	22.94	0	0	1	1	1	1	2	0	1	1	1	0	1	1
587	47	25.69	0	0	1	1	1	0	2	0	1	1	1	0	1	2
588	48	25.81	0	1	1	1	0	0	2	0	1	1	1	0	1	2
589	51	19.31	0	0	1	1	1	1	2	0	1	1	1	0	1	1
590	74	25.29	0	1	1	1	0	0	2	0	1	1	2	1	2	2
591	58	30.96	0	1	1	1	0	0	2	0	1	1	1	0	1	3
592	42	20.84	0	0	2	0	0	0	1	1	0	2	1	0	1	1
593	42	22.5	0	0	1	1	0	0	2	0	1	1	2	1	1	1
594	29	18	0	0	2	0	1	0	1	1	0	2	2	1	1	1
595	61	18.95	1	0	1	0	0	0	1	0	1	1	2	1	2	1
596	60	23.82	1	0	1	1	0	0	2	0	1	1	1	0	1	1
597	59	21.75	0	0	2	0	1	0	1	1	0	2	1	0	1	1
598	55	25.53	1	1	1	1	1	0	2	0	1	1	1	0	1	2
599	63	24.06	1	1	1	1	1	0	2	0	0	1	1	0	2	1
600	43	20.43	0	0	1	1	0	0	2	0	1	1	2	1	1	1
601	39	28.79	0	0	1	1	1	0	2	0	1	1	1	0	1	2
602	70	22.46	0	0	1	1	0	0	2	0	1	1	1	0	2	1
603	36	28.4	0	0	2	1	0	0	1	1	0	2	1	0	1	2
604	52	30.12	1	0	1	1	1	1	2	0	1	1	2	1	1	3
605	62	22.26	0	0	1	1	0	0	2	0	1	1	1	0	2	1
606	44	24.5	0	0	2	1	0	0	1	1	0	1	1	0	1	1
607	41	32.88	0	0	2	1	0	0	1	1	0	2	1	0	1	3
608	58	29.48	0	0	2	1	0	0	2	1	0	1	3	1	1	2
609	42	23.06	0	0	1	1	1	0	2	0	1	1	1	0	1	1
610	39	17.31	0	0	2	0	0	0	1	1	0	2	2	1	1	1
611	39	22.66	0	0	2	1	0	0	1	1	0	2	1	0	1	1
612	71	27.52	1	0	2	0	1	0	1	1	0	2	1	0	2	2
613	46	30.12	0	0	2	1	1	0	1	1	0	2	1	0	1	3
614	61	25.78	0	0	1	1	0	1	2	0	1	1	1	0	2	2
615	53	23.05	1	0	1	1	0	0	2	0	1	1	2	1	1	1
616	69	20.81	0	0	1	1	0	0	2	0	1	1	2	1	2	1
617	54	26.95	0	0	1	0	0	1	2	0	1	1	2	1	1	2
618	62	21.78	0	0	1	1	0	0	2	0	1	1	3	1	2	1
619	63	28.58	0	1	1	1	0	0	2	0	0	1	1	0	2	2
620	52	24.22	0	0	2	1	1	0	1	1	0	2	1	0	1	1
621	55	25.15	0	0	2	1	0	0	1	1	0	2	1	0	1	2
622	65	28.53	0	0	2	0	1	0	1	1	0	2	1	0	2	2
623	48	24.13	1	1	1	1	0	1	2	0	1	1	1	0	1	1
624	68	26.45	1	1	2	0	1	0	1	1	0	2	1	0	2	2
625	59	17.77	0	0	1	1	1	0	2	0	1	1	2	1	1	1
626	45	20.01	0	0	1	1	0	1	2	0	1	1	2	1	1	1
627	50	25.22	0	0	1	1	0	0	2	0	1	1	2	1	1	2
628	58	28.89	0	0	1	1	0	1	2	0	1	1	1	0	1	2
629	39	31.97	0	1	1	1	0	0	2	0	1	1	1	0	1	3
630	54	24.98	0	0	1	1	1	0	2	0	1	1	1	0	1	1
631	40	23.2	0	1	1	1	0	1	2	0	1	1	1	0	1	1
632	67	18.59	1	1	1	1	1	0	2	0	1	1	1	0	2	1
633	54	18.43	0	0	2	0	0	0	1	1	0	2	2	1	1	1
634	50	22.52	0	0	1	1	0	0	2	0	1	1	1	0	1	1
635	46	20.31	0	0	2	0	1	0	1	1	0	2	2	1	1	1
636	55	29.33	0	0	1	1	1	0	2	0	1	1	1	0	1	2

## Sheet: codebook
DM	HT	CMT	Hormone	Targeted	Boost	Bolus	Surgical types	Fields treated	RT Type	Grade_ group	BMI_group	Age_group
No = 0	No = 0	No = 0	No = 0	No = 0	No = 0	No = 0	Mastectomy = 1	Primary site = 1	Conventional = 0	Grade < 2 = 0	<25 = 1	< 60 = 1
Yes = 1	Yes = 1	Yes = 1	Yes = 1	Yes = 1	Yes = 1	Yes = 1	Breast Conserving = 2	Primary site & Regional Lymph nodes = 2	Hypofraction = 1	Grade ≥ 2 = 1	25-29.9 = 2	≥ 60 = 2
											≥ 30 = 3
